# Supplementary material for: Changes in salivary oxytocin in response to biologically-relevant events in farm animals: method optimization and usefulness as a biomarker
Source: Front Physiol. 2024 Mar 19;15:1370557. doi: 10.3389/fphys.2024.1370557 (PMC10985263; doi:10.3389/fphys.2024.1370557)
Supplement: Supplementary file 1 [file DataSheet3.XLSX]

## Sheet: Data for Parallelism
Species	method	assay_date_yy.mm.dd	sample	sample_details	OD	ODminusNSBwells	oxt_pg_ml	b_Bo	logit_b_Bo	log_conc
Pigs	Extraction	24.07.23	dilution	undiluted	0.4065	0.1735	478.214	0.208034	-1.33682	2.67962
Pigs	Extraction	24.07.23	dilution	1to2	0.5425	0.3095	197.664	0.371103	-0.527487	2.29593
Pigs	Extraction	24.07.23	dilution	1to4	0.6965	0.4635	91.02	0.555755	0.223953	1.95914
Pigs	Extraction	24.07.23	dilution	1to8	0.8475	0.6145	42.452	0.736811	1.02946	1.6279
Pigs	Extraction	24.07.23	dilution	1to16	0.9645	0.7315	20.034	0.877098	1.96523	1.30177
Pigs	Extraction	24.07.23	standard	S1	0.363	0.13	712.271	0.155875	-1.68924	2.85265
Pigs	Extraction	24.07.23	standard	S2	0.431	0.198	395.951	0.23741	-1.16693	2.59764
Pigs	Extraction	24.07.23	standard	S3	0.552	0.319	187.461	0.382494	-0.478976	2.27291
Pigs	Extraction	24.07.23	standard	S4	0.6895	0.4565	94.436	0.547362	0.190018	1.97514
Pigs	Extraction	24.07.23	standard	S5	0.8445	0.6115	43.171	0.733213	1.01099	1.63519
Pigs	Extraction	24.07.23	standard	S6	0.926	0.693	26.37	0.830935	1.59227	1.42111
Pigs	Extraction	24.07.23	standard	S7	1.0255	0.7925	11.463	0.95024	2.9495	1.0593
Pigs	Spiked-Unextracted	16.11.23	dilution	1to2	0.4775	0.3575	169.084	0.358756	-0.580769	2.2281
Pigs	Spiked-Unextracted	16.11.23	dilution	1to4	0.593	0.473	101.8	0.474661	-0.101442	2.00775
Pigs	Spiked-Unextracted	16.11.23	dilution	1to8	0.745	0.625	51.091	0.627195	0.520203	1.70834
Pigs	Spiked-Unextracted	16.11.23	dilution	1to16	0.867	0.747	23.898	0.749624	1.09661	1.37836
Pigs	Spiked-Unextracted	16.11.23	standard	S1	0.255	0.135	752.692	0.135474	-1.8534	2.87662
Pigs	Spiked-Unextracted	16.11.23	standard	S2	0.331	0.211	378.021	0.211741	-1.31446	2.57752
Pigs	Spiked-Unextracted	16.11.23	standard	S3	0.4575	0.3375	185.635	0.338685	-0.669158	2.26866
Pigs	Spiked-Unextracted	16.11.23	standard	S4	0.614	0.494	93.05	0.495735	-0.0170601	1.96872
Pigs	Spiked-Unextracted	16.11.23	standard	S5	0.752	0.632	49.183	0.63422	0.550363	1.69182
Pigs	Spiked-Unextracted	16.11.23	standard	S6	0.875	0.755	22.295	0.757652	1.13985	1.34821
Pigs	Spiked-Unextracted	16.11.23	standard	S7	0.939	0.819	10.41	0.821877	1.52911	1.01745
Pigs	Spiked-Unextracted	16.11.23	standard	S8	0.957	0.837	7.142	0.83994	1.65778	0.85382
Horses	Extraction	23.10.23	dilution	undiluted	0.282	0.161	408.887	0.171825	-1.57275	2.6116
Horses	Extraction	23.10.23	dilution	1to2	0.433	0.312	160.535	0.332978	-0.694748	2.20557
Horses	Extraction	23.10.23	dilution	1to4	0.581	0.46	83.507	0.490928	-0.03629	1.92172
Horses	Extraction	23.10.23	dilution	1to8	0.731	0.61	42.695	0.651014	0.623499	1.63038
Horses	Extraction	23.10.23	dilution	1to16	0.857	0.736	19.288	0.785486	1.29793	1.28529
Horses	Extraction	23.10.23	standard	S1	0.228	0.107	754.067	0.114194	-2.0486	2.87741
Horses	Extraction	23.10.23	standard	S2	0.295	0.174	365.176	0.185699	-1.4782	2.5625
Horses	Extraction	23.10.23	standard	S3	0.397	0.276	191.922	0.294557	-0.873353	2.28312
Horses	Extraction	23.10.23	standard	S4	0.55	0.429	95.558	0.457844	-0.169025	1.98027
Horses	Extraction	23.10.23	standard	S5	0.725	0.604	43.958	0.64461	0.595432	1.64304
Horses	Extraction	23.10.23	standard	S6	0.826	0.705	24.482	0.752401	1.11146	1.38885
Horses	Extraction	23.10.23	standard	S7	0.894	0.773	13.383	0.824973	1.55041	1.12655
Horses	Unextracted	29.11.23	dilution	1to2	0.4325	0.308	178.397	0.32387	-0.736045	2.25139
Horses	Unextracted	29.11.23	dilution	1to4	0.5915	0.467	84.132	0.491062	-0.0357556	1.92496
Horses	Unextracted	29.11.23	dilution	1to8	0.7165	0.592	46.968	0.622503	0.500184	1.6718
Horses	Unextracted	29.11.23	dilution	1to16	0.8275	0.703	24.746	0.739222	1.04193	1.39351
Horses	Unextracted	29.11.23	dilution	1to32	0.9145	0.79	11.349	0.830705	1.59063	1.05496
Horses	Unextracted	29.11.23	standard	S1	0.25	0.1255	731.778	0.131966	-1.88368	2.86438
Horses	Unextracted	29.11.23	standard	S2	0.3105	0.186	389.609	0.195584	-1.41413	2.59063
Horses	Unextracted	29.11.23	standard	S3	0.4255	0.301	185.22	0.316509	-0.769862	2.26769
Horses	Unextracted	29.11.23	standard	S4	0.572	0.4475	91.803	0.470557	-0.117907	1.96286
Horses	Unextracted	29.11.23	standard	S5	0.708	0.5835	48.972	0.613565	0.462321	1.68995
Horses	Unextracted	29.11.23	standard	S6	0.8365	0.712	23.22	0.748686	1.09161	1.36586
Horses	Unextracted	29.11.23	standard	S7	0.92	0.7955	10.462	0.836488	1.63233	1.01961
Horses	Unextracted	29.11.23	standard	S8	0.948	0.8235	6.679	0.865931	1.86545	0.824711

## Sheet: Recovery-Extracted Pig Samples
Pool	Spike	concentration standard (pg/ml)	volume standard	concentration standard (pg per 25 ul)	concentration pool 1 (pg/ml)	volume pool 1	Concentration pool (pg per 225 ul)	Final volume	Expected concentration on plate (pg/ml)	Actual concentration on plate (pg/ml)	Percent recovery
Pig_Extracted_Pool1	High spike	7500	25 μl	187.5	130.698	225 μl	29.43	250 µl	867.72	917.483	105.735
Pig_Extracted_Pool1	Medium spike	3750	25 μl	93.75	130.698	225 μl	29.43	250 µl	492.72	439.682	89.2357
Pig_Extracted_Pool1	Low spike	1875	25 μl	46.875	130.698	225 μl	29.43	250 µl	305.22	242.826	79.5577
Pig_Extracted_Pool2	High spike	7500	25 μl	187.5	61.535	225 μl	13.98	250 µl	805.92	828.526	102.805
Pig_Extracted_Pool2	Medium spike	3750	25 μl	93.75	61.535	225 μl	13.98	250 µl	430.92	427.576	99.224
Pig_Extracted_Pool2	Low spike	1875	25 μl	46.875	61.535	225 μl	13.98	250 µl	243.42	212.837	87.4361
										Average % recovery	93.9989
										Standard deviation recovery	10.1675

## Sheet: Recovery-Extracted Horse Sample
Pool	Spike	concentration standard (pg/ml)	volume standard	concentration standard (pg per 25 ul)	concentration pool 1 (pg/ml)	volume pool 1	Concentration pool (pg per 225 ul)	Final volume	Expected concentration on plate (pg/ml)	Actual concentration	Percent recovery
Horse_Extracted_Pool1	High spike	7500	25 μl	187.5	261.202	225 μl	58.8293	250 µl	985.317	1019.25	103.443
Horse_Extracted_Pool1	Medium spike	3750	25 μl	93.75	261.202	225 μl	58.8293	250 µl	610.317	570.173	93.4224
Horse_Extracted_Pool1	Low spike	1875	25 μl	46.875	261.202	225 μl	58.8293	250 µl	422.817	340.355	80.497
Horse_Extracted_Pool2	High spike	7500	25 μl	187.5	169.305	225 μl	38.0974	250 µl	902.39	1105.76	122.537
Horse_Extracted_Pool2	Medium spike	3750	25 μl	93.75	169.305	225 μl	38.0974	250 µl	527.39	587.156	111.332
Horse_Extracted_Pool2	Low spike	1875	25 μl	46.875	169.305	225 μl	38.0974	250 µl	339.89	329.714	97.0062
Horse_Extracted_Pool3	High spike	7500	25 μl	187.5	123.451	225 μl	27.7793	250 µl	861.117	834.96	96.9624
Horse_Extracted_Pool3	Medium spike	3750	25 μl	93.75	123.451	225 μl	27.7793	250 µl	486.117	477.787	98.2864
Horse_Extracted_Pool3	Low spike	1875	25 μl	46.875	123.451	225 μl	27.7793	250 µl	298.617	281.632	94.3121
										Average % recovery	99.7555
										Standard deviation recovery	11.8573

## Sheet: Recovery-Unextracted Horse Samp
Pool	Spike	concentration standard (pg/ml)	volume standard	concentration standard (pg per 25 ul)	concentration pool 1 (pg/ml)	volume pool 1	Concentration pool (pg per 225 ul)	Final volume	Expected concentration on plate (pg/ml)	Actual concentration	Percent recovery
Horse_Unextracted_Pool1	High spike	7500	25 μl	187.5	346.778	225 μl	78.0329	250 µl	1062.13	955.737	89.9829
Horse_Unextracted_Pool1	Medium spike	3750	25 μl	93.75	346.778	225 μl	78.0329	250 µl	687.131	693.63	100.946
Horse_Unextracted_Pool1	Low spike	1875	25 μl	46.875	346.778	225 μl	78.0329	250 µl	499.631	421.938	84.4499
Horse_Unextracted_Pool2	High spike	7500	25 μl	187.5	398.889	225 μl	89.759	250 µl	1109.04	1313.45	118.432
Horse_Unextracted_Pool2	Medium spike	3750	25 μl	93.75	398.889	225 μl	89.759	250 µl	734.036	828.323	112.845
Horse_Unextracted_Pool2	Low spike	1875	25 μl	46.875	398.889	225 μl	89.759	250 µl	546.536	598.49	109.506
Horse_Unextracted_Pool3	High spike	7500	25 μl	187.5	290.509	225 μl	65.3711	250 µl	1011.48	1084.23	107.192
Horse_Unextracted_Pool3	Medium spike	3750	25 μl	93.75	290.509	225 μl	65.3711	250 µl	636.484	767.698	120.615
Horse_Unextracted_Pool3	Low spike	1875	25 μl	46.875	290.509	225 μl	65.3711	250 µl	448.984	464.06	103.358
										Average % recovery	105.259
										Standard deviation recovery	12.1309
