# Supplementary material for: Changes in salivary oxytocin in response to biologically-relevant events in farm animals: method optimization and usefulness as a biomarker
Source: Front Physiol. 2024 Mar 19;15:1370557. doi: 10.3389/fphys.2024.1370557 (PMC10985263; doi:10.3389/fphys.2024.1370557)
Supplement: Supplementary file 3 [file DataSheet2.XLSX]

## Sheet: Sow_Birth_Samples
sow_ID	environment	context	time_point	date_yy_mm_dd	time_sample	OXT_pgmL
6733	Conventional	Birth	after	22/10/21	10:39:00	334.663
6733	Conventional	Birth	During1	22/10/20	07:02:00	320.013
6733	Conventional	Birth	During2	22/10/20	07:09:00	302.677
6733	Conventional	Birth	During3	22/10/20	07:17:00	276.529
6734	Conventional	Birth	after	22/10/21	10:33:00	175.197
6734	Conventional	Birth	During1	22/10/20	08:59:00	214.106
6734	Conventional	Birth	During2	22/10/20	09:05:00	144.249
6734	Conventional	Birth	During3	22/10/20	09:12:00	187.665
6791	Conventional	Birth	after	23/03/17	09:34:00	62.171
6791	Conventional	Birth	During1	23/03/16	08:14:00	189.214
6791	Conventional	Birth	During2	23/03/16	08:19:00	261.126
6791	Conventional	Birth	During3	23/03/16	08:26:00	250.314
6794	Conventional	Birth	after	23/03/17	09:37:00	95.181
6794	Conventional	Birth	During1	23/03/16	11:03:00	241.079
6794	Conventional	Birth	During2	23/03/16	11:08:00	186.478
6794	Conventional	Birth	During3	23/03/16	11:14:00	258.142
6799	Conventional	Birth	after	23/03/17	09:37:00	190.304
6799	Conventional	Birth	During1	23/03/16	09:44:00	261.761
6799	Conventional	Birth	During2	23/03/16	09:49:00	341.949
6799	Conventional	Birth	During3	23/03/16	09:54:00	279.762
6924	Conventional	Birth	after	23/10/12	10:00:00	105.899
6924	Conventional	Birth	During1	23/10/11	10:56:00	366.027
6924	Conventional	Birth	During2	23/10/11	11:03:00	403.249
6924	Conventional	Birth	During3	23/10/11	11:09:00	339.086
6738	Enriched	Birth	after	22/10/21	10:12:00	104.315
6738	Enriched	Birth	During1	22/10/20	09:23:00	358.414
6738	Enriched	Birth	During2	22/10/20	09:30:00	220.601
6738	Enriched	Birth	During3	22/10/20	09:37:00	280.928
6877	Enriched	Birth	after	23/03/30	09:35:00	76.676
6877	Enriched	Birth	During1	23/03/29	07:33:00	196.667
6877	Enriched	Birth	During2	23/03/29	07:39:00	135.398
6877	Enriched	Birth	During3	23/03/29	07:45:00	354.121
6943	Enriched	Birth	after	23/11/03	10:10:00	237.49
6943	Enriched	Birth	During1	23/11/02	09:43:00	561.92
6943	Enriched	Birth	During2	23/11/02	09:48:00	350.776
6943	Enriched	Birth	During3	23/11/02	09:55:00	459.422
6949	Enriched	Birth	after	23/11/03	09:56:00	126.567
6949	Enriched	Birth	During1	23/11/02	10:47:00	219.604
6949	Enriched	Birth	During2	23/11/02	10:52:00	262.401
6949	Enriched	Birth	During3	23/11/02	10:57:00	419.033

## Sheet: Sow_Separation_Samples
sow_ID	environment	separation_day	context	time_point	date_yy_mm_dd	time_sample	OXT_pgmL
6733	conventional	LT27	separation	before	22/11/16	08:14:00	124.903
6733	conventional	LT27	separation	during separation	22/11/16	09:33:00	71.391
6734	conventional	LT27	separation	before	22/11/16	09:08:00	266.43
6734	conventional	LT27	separation	during separation	22/11/16	10:51:00	111.209
6738	enriched	LT41	separation	before	22/11/30	07:55:00	305.158
6738	enriched	LT41	separation	during separation	22/11/30	09:19:00	222.999
6740	enriched	LT41	separation	before	22/11/30	08:35:00	207.379
6740	enriched	LT41	separation	during separation	22/11/30	09:48:00	174.231
6791	conventional	LT27	separation	before	23/04/12	09:29:00	146.418
6791	conventional	LT27	separation	during separation	23/04/12	10:50:00	324.327
6794	conventional	LT27	separation	before	23/04/12	10:13:00	207.436
6794	conventional	LT27	separation	during separation	23/04/12	11:40:00	122.695
6843	conventional	LT27	separation	before	23/06/14	08:02:00	134.976
6843	conventional	LT27	separation	during separation	23/06/14	09:55:00	123.834
6845	conventional	LT27	separation	before	23/06/14	07:30:00	162.132
6845	conventional	LT27	separation	during separation	23/06/14	09:11:00	108.616
6876	enriched	LT41	separation	before	23/07/05	07:36:00	312.267
6876	enriched	LT41	separation	during separation	23/07/05	09:09:00	140.021
6877	enriched	LT41	separation	before	23/07/05	07:00:00	149.133
6877	enriched	LT41	separation	during separation	23/07/05	08:39:00	123.955

## Sheet: Mare_Birth_Samples
Horse_ID	context	time_point	date_yy.mm.dd	time_sample	OXT_pgml
Bu	birth	before	22.05.06	21:50:00	247.036
Bu	birth	during	22.05.07	00:40:00	404.009
Do	birth	before	23.05.14	21:50:00	145.881
Do	birth	during	23.05.16	00:22:00	355.769
Fo	birth	before	23.05.01	18:45:00	195.017
Fo	birth	during	23.05.02	00:50:00	364.303
Hi	birth	before	22.06.03	19:45:00	211.834
Hi	birth	during	22.06.04	19:50:00	329.04
Ki	birth	before	23.05.14	21:45:00	318.291
Ki	birth	during	23.05.15	02:10:00	362.192
Ra	birth	before	23.05.14	22:00:00	221.879
Ra	birth	during	23.05.16	04:45:00	378.615
Va	birth	before	23.05.06	21:55:00	275.181
Va	birth	during	23.05.07	04:00:00	365.922
